# Supplementary material for: Ambient and sub-ambient temperature direct air CO2 capture (DAC) by novel supported in situ polymerized amines
Source: Royal Society of Chemistry journal article supplement (doi:10.1039/d3ta07909k), 2024-01-01
Supplement: d3ta07909k1.pdf [file d3ta07909k1.pdf]

## Supporting Information

### **Ambient and sub-ambient temperature direct air CO<sub>2</sub> capture (DAC) by novel supported in-situ polymerized amines**

Akram A. Al-Absi, Anne M. Benneker, Nader Mahinpey\*

Department of Chemical and Petroleum Engineering, Schulich School of Engineering, University of Calgary, Calgary, AB, T2N 1N4, Canada

\* **Corresponding author:** [nader.mahinpey@ucalgary.ca](mailto:nader.mahinpey@ucalgary.ca)

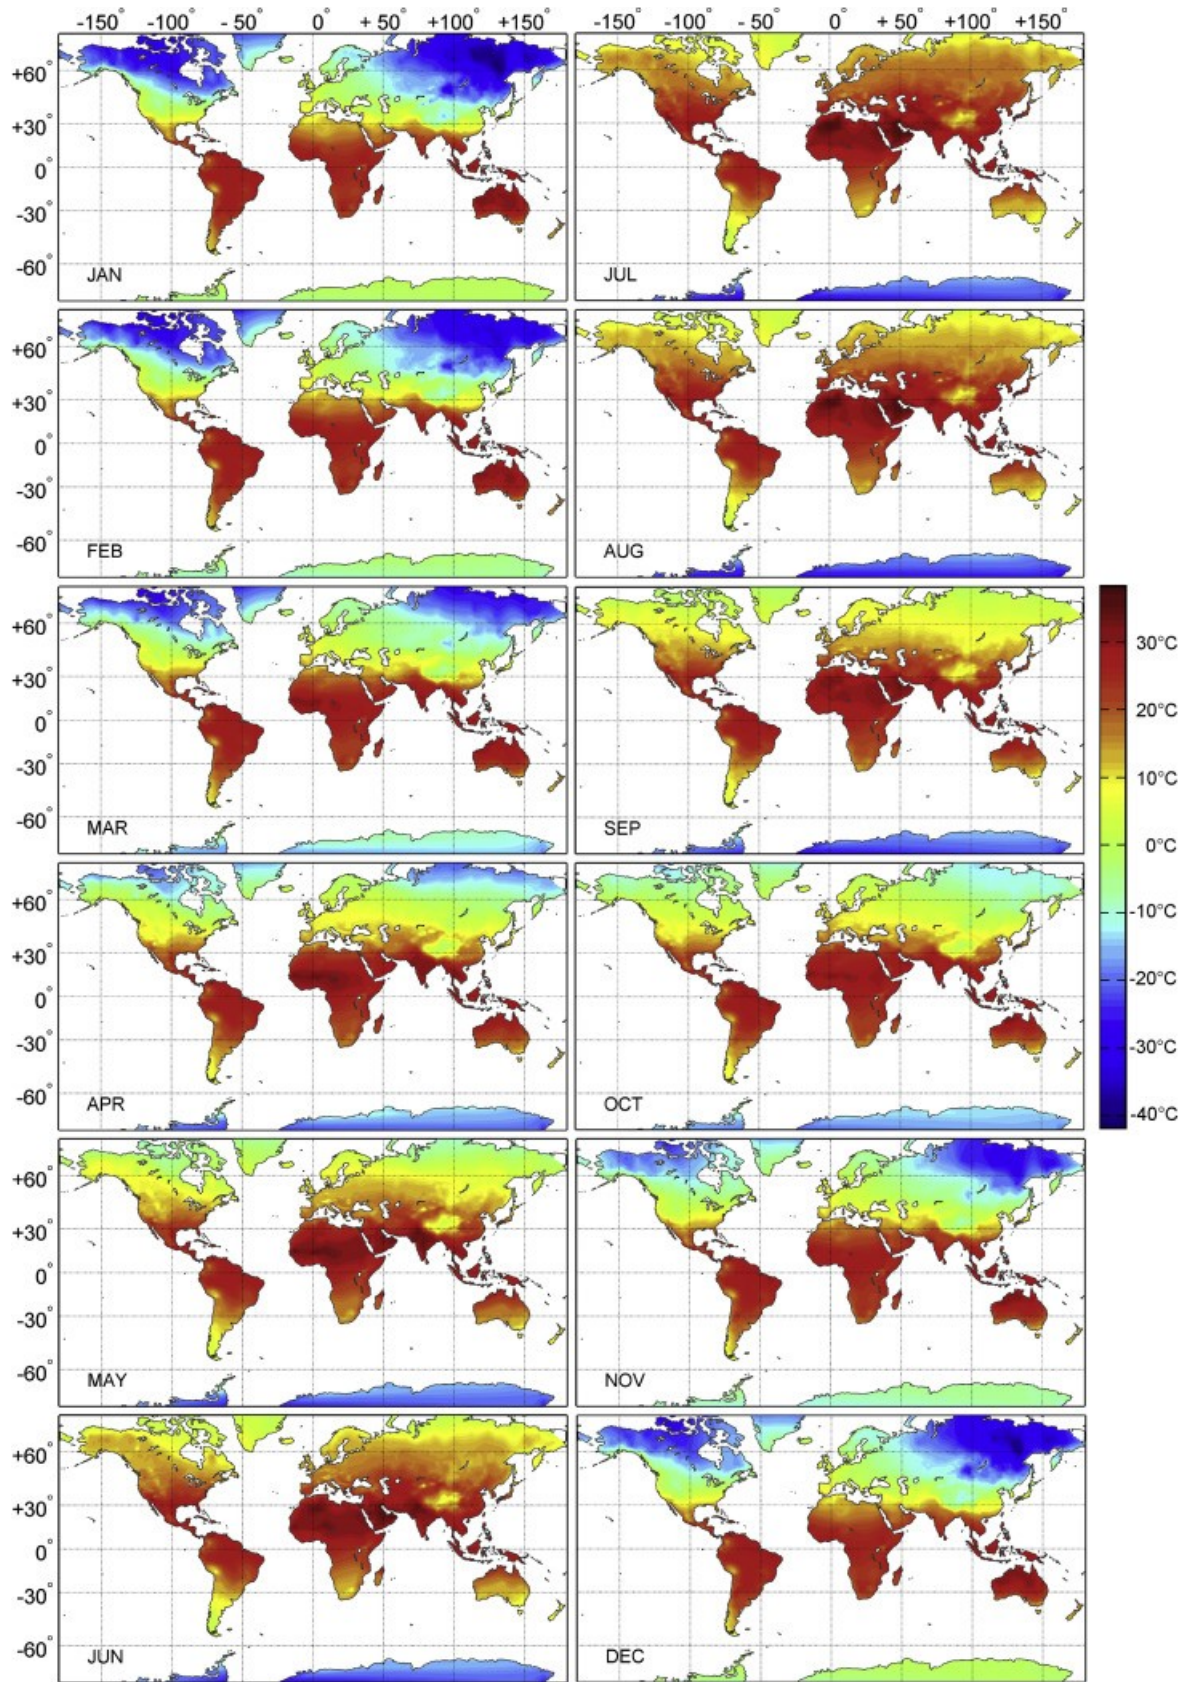

Supporting Figure S.1 Temporal distribution of mean temperature (°C). Copyright 2016 Elsevier<sup>1</sup>

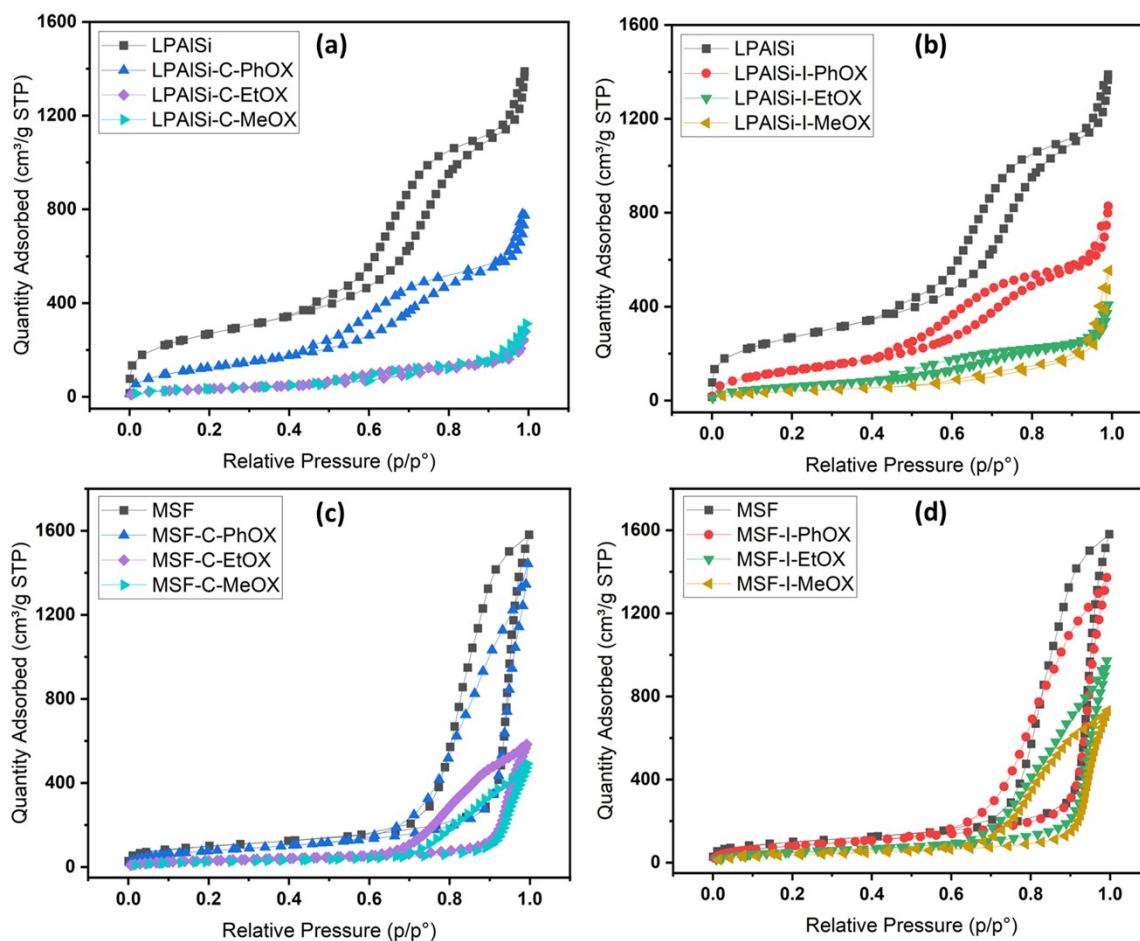

Figure S.2  $N_2$  adsorption-desorption isotherms at  $-195.8^\circ\text{C}$  of (a) and (b) LPAISi based materials, (c) and (d) MSF based materials.

Supporting Table S.1 kinetic parameters for pseudo-1st-order and pseudo-2nd-order models for  $CO_2$  adsorption at different conditions

| Adsorption conditions        | First order                 |         |        |         |      |                    |                  |
|------------------------------|-----------------------------|---------|--------|---------|------|--------------------|------------------|
|                              | $k_1$ ( $\text{min}^{-1}$ ) | $q_e^*$ | $R_2$  | RSS (%) | ARE% | $q_{\text{exp}}^*$ | $\Delta q_e$ (%) |
| $20^\circ\text{C}$ , 0% RH   | 0.0058                      | 1.56    | 0.9955 | 7.8     | 11.2 | 1.46               | 6.9              |
| $20^\circ\text{C}$ , 29% RH  | 0.0038                      | 2.23    | 0.9941 | 11.1    | 12.3 | 1.92               | 16.0             |
| $20^\circ\text{C}$ , 62% RH  | 0.0023                      | 3.34    | 0.9961 | 10.5    | 10.1 | 2.45               | 35.9             |
| $20^\circ\text{C}$ , 83% RH  | 0.0032                      | 2.51    | 0.9956 | 10.0    | 10.8 | 2.08               | 20.7             |
| $-20^\circ\text{C}$ , 62% RH | 0.0053                      | 1.44    | 0.9995 | 2.3     | 4.5  | 1.40               | 2.5              |
| $0^\circ\text{C}$ , 62% RH   | 0.0039                      | 2.11    | 0.9976 | 6.6     | 9.0  | 1.88               | 12.1             |
| $40^\circ\text{C}$ , 62% RH  | 0.0038                      | 2.16    | 0.9955 | 9.4     | 11.1 | 1.87               | 15.3             |
| $60^\circ\text{C}$ , 62% RH  | 0.0106                      | 0.85    | 0.9982 | 3.1     | 6.6  | 0.83               | 2.3              |
| $80^\circ\text{C}$ , 62% RH  | 0.0338                      | 0.30    | 0.9990 | 0.9     | 3.1  | 0.30               | 0.7              |
| Second order                 |                             |         |        |         |      |                    |                  |
|                              | $k_2$ #                     | $q_e^*$ | $R_2$  | RSS %   | ARE% | $q_{\text{exp}}^*$ | $\Delta q_e$ (%) |

|               |        |      |        |      |      |      |       |
|---------------|--------|------|--------|------|------|------|-------|
| 20°C, 0% RH   | 0.0026 | 2.03 | 0.9919 | 10.4 | 14.8 | 1.46 | 39.3  |
| 20°C, 29% RH  | 0.0009 | 3.19 | 0.9916 | 13.1 | 14.3 | 1.92 | 66.0  |
| 20°C, 62% RH  | 0.0003 | 5.29 | 0.9952 | 11.6 | 10.9 | 2.45 | 115.8 |
| 20°C, 83% RH  | 0.0006 | 3.71 | 0.9938 | 11.8 | 12.4 | 2.08 | 78.6  |
| -20°C, 62% RH | 0.0025 | 1.89 | 0.9983 | 4.3  | 8.0  | 1.40 | 34.6  |
| 0°C, 62% RH   | 0.0010 | 2.99 | 0.9959 | 8.7  | 11.3 | 1.88 | 58.9  |
| 40°C, 62% RH  | 0.0010 | 3.07 | 0.9932 | 11.5 | 13.2 | 1.87 | 64.2  |
| 60°C, 62% RH  | 0.0128 | 0.99 | 0.9940 | 5.6  | 12.0 | 0.83 | 19.5  |
| 80°C, 62% RH  | 0.1876 | 0.32 | 0.9955 | 1.9  | 7.2  | 0.30 | 6.8   |

\* mmolCO<sub>2</sub>/g, # (g/mmol CO<sub>2</sub>/min).

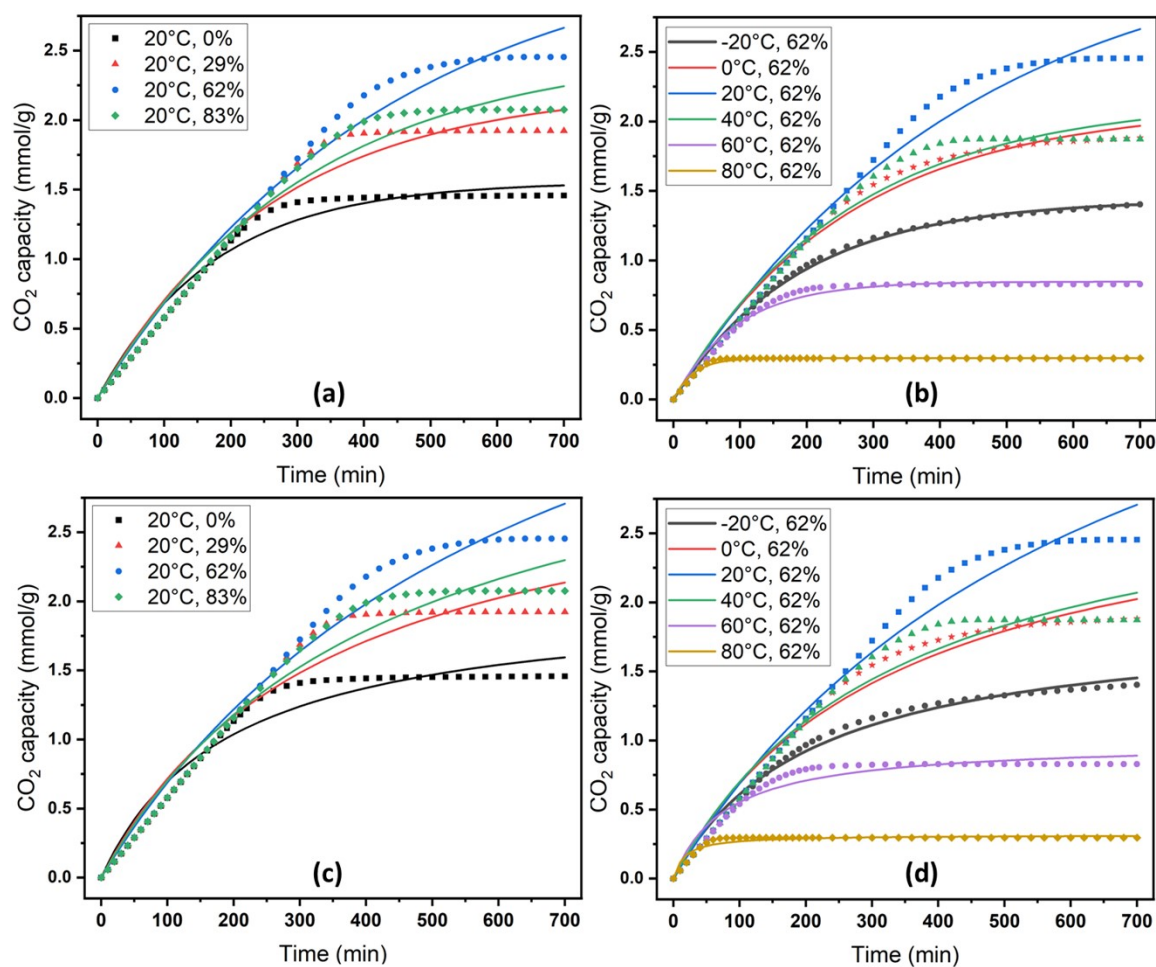

Supporting Figure S.3 Experimental CO<sub>2</sub> adsorption data versus first (a, b) and second order kinetics models (c, d): (a, c) at different temperatures, (b, d) at different relative humidities.

Supporting Table S.2 Langmuir and Freundlich isotherms' parameters for MSF-C-EtOX and LPAISi-C-EtOX at different temperatures.

| Model         | parameter                               | MSF-C-EtOX  |             |             |             |             |
|---------------|-----------------------------------------|-------------|-------------|-------------|-------------|-------------|
|               | Temperature                             | -20 °C      | 0 °C        | 20 °C       | 40 °C       | 60 °C       |
| Langmuir      | $q_m$ (mmol/g)                          | 1.18        | 1.33        | 1.85        | 2.47        | 2.02        |
|               | $K_L$ (mbar <sup>-1</sup> )             | 16.91       | 4.83        | 5.85        | 5.20        | 1.38        |
|               | <b>RSS %</b>                            | <b>9.7</b>  | <b>13.1</b> | <b>11.7</b> | <b>9.3</b>  | <b>8.7</b>  |
|               | <b>ARE%</b>                             | <b>7.2</b>  | <b>9.2</b>  | <b>6.5</b>  | <b>3.6</b>  | <b>6.5</b>  |
| Freundlich    | n                                       | 12.53       | 13.59       | 12.54       | 18.03       | 9.89        |
|               | $K_F$ (mmol/g(mbar) <sup>(-1/n)</sup> ) | 0.74        | 0.87        | 1.16        | 1.82        | 1.10        |
|               | <b>RSS %</b>                            | <b>2.8</b>  | <b>2.9</b>  | <b>14.5</b> | <b>16.8</b> | <b>20.8</b> |
|               | <b>ARE%</b>                             | <b>2.1</b>  | <b>2.0</b>  | <b>10.9</b> | <b>6.4</b>  | <b>20.1</b> |
| LPAISi-C-EtOX |                                         |             |             |             |             |             |
| Langmuir      | $q_m$ (mmol/g)                          | 1.92        | 1.07        | 1.88        | 2.54        | 2.46        |
|               | $K_L$ (mbar <sup>-1</sup> )             | 0.02        | 2.95        | 0.12        | 4.64        | 0.33        |
|               | <b>RSS %</b>                            | <b>16.1</b> | <b>11.6</b> | <b>20.2</b> | <b>13.7</b> | <b>12.8</b> |
|               | <b>ARE%</b>                             | <b>10.6</b> | <b>10.0</b> | <b>10.1</b> | <b>5.2</b>  | <b>7.0</b>  |
| Freundlich    | BT (J.g/mmol <sup>2</sup> )             | 8.769       | 26.503      | 15.889      | 21.106      | 10.943      |
|               | $K_F$ (mmol/g(mbar) <sup>(-1/n)</sup> ) | 2           | 773         | 356         | 4015300     | 44          |
|               | <b>RSS %</b>                            | <b>11.1</b> | <b>5.0</b>  | <b>9.2</b>  | <b>10.1</b> | <b>13.0</b> |
|               | <b>ARE%</b>                             | <b>3.0</b>  | <b>4.0</b>  | <b>3.5</b>  | <b>3.6</b>  | <b>16.5</b> |

## References

- 1 M. Mourshed, *Renewable energy*, 2016, **94**, 55–71.
